# Supplementary material for: Dissection of Maize Drought Tolerance at the Flowering Stage Using Genome-Wide Association Studies
Source: MDPI journal article supplement (doi:10.3390/genes13040564), 2022-03-23
Supplement: s1 [file s1]

Table S1 List of inbred lines used for GWAS analysis

| No. | Line     |
|-----|----------|-----|----------|-----|----------|-----|----------|-----|----------|
| 1   | CML172   | 57  | CIMBL91  | 113 | CIMBL53  | 169 | GEMS11   | 225 | LK11     |
| 2   | LIAO5262 | 58  | CIMBL51  | 114 | CIMBL3   | 170 | TY11     | 226 | 150      |
| 3   | CML189   | 59  | CIMBL19  | 115 | CIMBL156 | 171 | GEMS49   | 227 | ZHENG28  |
| 4   | CIMBL2   | 60  | B11      | 116 | CML20    | 172 | GL178    | 228 | TY3      |
| 5   | CIMBL55  | 61  | CIMBL13  | 117 | CIMBL75  | 173 | QI319    | 229 | GEMS42   |
| 6   | CML423   | 62  | GEMS13   | 118 | CIMBL82  | 174 | SW92E114 | 230 | CIMBL147 |
| 7   | CIMBL125 | 63  | CIMBL88  | 119 | JIAO51   | 175 | CIMBL111 | 231 | CIMBL140 |
| 8   | GEMS23   | 64  | CIMBL43  | 120 | GEMS14   | 176 | CIMBL66  | 232 | CA47     |
| 9   | CIMBL122 | 65  | CIMBL40  | 121 | LX9801   | 177 | DAN340   | 233 | GEMS39   |
| 10  | CML426   | 66  | CIMBL79  | 122 | CIMBL6   | 178 | CML139   | 234 | CIMBL116 |
| 11  | CIMBL38  | 67  | CIMBL150 | 123 | BY855    | 179 | CIMBL10  | 235 | GEMS3    |
| 12  | CML290   | 68  | CIMBL115 | 124 | SHEN5003 | 180 | CIMBL54  | 236 | CML162   |
| 13  | CIMBL123 | 69  | CIMBL81  | 125 | CIMBL96  | 181 | ZHENG30  | 237 | CIMBL15  |
| 14  | CIMBL102 | 70  | CIMBL113 | 126 | CIMBL93  | 182 | 268      | 238 | DAN4245  |
| 15  | CML171   | 71  | CIMBL70  | 127 | CIMBL69  | 183 | TY1      | 239 | CIMBL16  |
| 16  | CML304   | 72  | CIMBL92  | 128 | 07KS4    | 184 | CIMBL5   | 240 | CIMBL133 |
| 17  | CIMBL77  | 73  | CIMBL105 | 129 | LG001    | 185 | GEMS16   | 241 | CML361   |
| 18  | CIMBL124 | 74  | CML479   | 130 | Chang7-2 | 186 | 835A     | 242 | CIMBL129 |
| 19  | CIMBL120 | 75  | CIMBL22  | 131 | RY713    | 187 | GEMS36   | 243 | TY6      |
| 20  | CML69    | 76  | CIMBL32  | 132 | GEMS35   | 188 | TY4      | 244 | CHENG698 |
| 21  | CIMBL52  | 77  | GEMS32   | 133 | GEMS66   | 189 | GEMS5    | 245 | BY815    |
| 22  | CML32    | 78  | CML31    | 134 | GEMS28   | 190 | CML170   | 246 | CML323   |
| 23  | CML493   | 79  | CIMBL106 | 135 | GY386    | 191 | CIMBL62  | 247 | GEMS33   |
| 24  | CIMBL86  | 80  | CIMBL18  | 136 | JH96C    | 192 | CIMBL119 | 248 | CML121   |

|    |          |     |           |     |          |     |          |     |          |
|----|----------|-----|-----------|-----|----------|-----|----------|-----|----------|
| 25 | CIMBL48  | 81  | CIMBL74   | 137 | GEMS31   | 193 | CML130   | 249 | CIMBL139 |
| 26 | CIMBL121 | 82  | CML338    | 138 | BY813    | 194 | GEMS20   | 250 | CIMBL98  |
| 27 | CML163   | 83  | CIMBL108  | 139 | CIMBL49  | 195 | B151     | 251 | TIAN77   |
| 28 | CIMBL157 | 84  | CML192    | 140 | GEMS37   | 196 | CIMBL50  | 252 | GEMS17   |
| 29 | CIMBL68  | 85  | CML454    | 141 | 7327     | 197 | GEMS40   | 253 | GEMS15   |
| 30 | CML496   | 86  | CIMBL127  | 142 | CIMBL60  | 198 | SY1032   | 254 | TY5      |
| 31 | CIMBL114 | 87  | CML165    | 143 | CML191   | 199 | GEMS50   | 255 | CML122   |
| 32 | CIMBL152 | 88  | CIMBL25   | 144 | CML118   | 200 | DH3732   | 256 | 05WN230  |
| 33 | CIMBL29  | 89  | CIMBL28   | 145 | DAN599   | 201 | CML411   | 257 | GEMS6    |
| 34 | GEMS21   | 90  | CIMBL11   | 146 | BY4960   | 202 | CIMBL23  | 258 | BZN      |
| 35 | ZHONG69  | 91  | CIMBL7    | 147 | D863F    | 203 | CIMBL142 | 259 | ZAC546   |
| 36 | GEMS2    | 92  | BY4944    | 148 | K22      | 204 | GEMS29   | 260 | DONG46   |
| 37 | DAN3130  | 93  | HZ4       | 149 | DAN360   | 205 | GEMS62   | 261 | DONG237  |
| 38 | CHANG3   | 94  | YE515     | 150 | B77      | 206 | GEMS54   | 262 | WH413    |
| 39 | Q319-Bc6 | 95  | BY4839    | 151 | 647      | 207 | LY042    | 263 | GEMS61   |
| 40 | K10      | 96  | CIMBL145  | 152 | CML114   | 208 | M153     | 264 | TY-HZ4   |
| 41 | GEMS55   | 97  | CIMBL59   | 153 | CIMBL17  | 209 | MO17     | 265 | 335F     |
| 42 | MO113    | 98  | B113      | 154 | CIMBL153 | 210 | GY1007   | 266 | 335M     |
| 43 | 7884-4HT | 99  | Chuan48-2 | 155 | CML116   | 211 | WU109    | 267 | YE8001   |
| 44 | GEMS63   | 100 | M97       | 156 | CIMBL144 | 212 | 5213     | 268 | ZH68     |
| 45 | J4112    | 101 | JH59      | 157 | CIMBL42  | 213 | ZHENG653 | 269 | GY462    |
| 46 | CML325   | 102 | YE478     | 158 | LV28     | 214 | CIMBL141 | 270 | 478-BC6  |
| 47 | LIAO159  | 103 | CF773-2   | 159 | EN25     | 215 | P178     | 271 | ZB648    |
| 48 | HYS      | 104 | Y2348     | 160 | Z2018F   | 216 | SY1039   | 272 | GEMS58   |
| 49 | ZHENG58  | 105 | GEMS59    | 161 | 975-12   | 217 | ZHENG29  | 273 | CIMBL95  |
| 50 | GEMS64   | 106 | SY1052    | 162 | 4F1      | 218 | LIAO5114 | 274 | CIMBL83  |

|    |        |     |         |     |       |     |         |     |         |
|----|--------|-----|---------|-----|-------|-----|---------|-----|---------|
| 51 | GEMS44 | 107 | JY01    | 163 | TY2   | 219 | GEMS51  | 275 | SI273   |
| 52 | JI853  | 108 | CIMBL1  | 164 | ZZ01  | 220 | Y1382   | 276 | 4019    |
| 53 | GEMS1  | 109 | 1462    | 165 | ZHI41 | 221 | JI63    | 277 | YE52106 |
| 54 | 9642   | 110 | FCD0602 | 166 | B110  | 222 | 835B    | 278 | QI205   |
| 55 | 526018 | 111 | BY809   | 167 | L3180 | 223 | CIMBL89 | 279 | P138    |
| 56 | RY729  | 112 | GEMS18  | 168 | GEMS9 | 224 | BY807   | -   | -       |

Table S2. Annotation of SNPs associated with ASI under two water regimes

| Traits       | Marker           | Chr | Position  | P value               | R <sup>2</sup> | Gene ID               | Annotation                           |
|--------------|------------------|-----|-----------|-----------------------|----------------|-----------------------|--------------------------------------|
| ASI-WW-17    | S2_196363855     | 2   | 196363855 | $8.08 \times 10^{-6}$ | 0.09659        | <i>Zm00001d006212</i> | Pseudo-response regulator homolog 1  |
|              | S4_167414078     | 4   | 167414078 | $6.39 \times 10^{-6}$ | 0.09828        | <i>Zm00001d051812</i> | Histidine kinase                     |
|              | S4_167413941     | 4   | 167413941 | $1.01 \times 10^{-5}$ | 0.0939         |                       |                                      |
|              | S8_167328471     | 8   | 167328471 | $2.50 \times 10^{-6}$ | 0.10746        | <i>Zm00001d012361</i> | Ataxin-3                             |
|              | chr8.S_141931981 | 8   | 141466190 | $4.28 \times 10^{-6}$ | 0.10757        | <i>Zm00001d011298</i> | C3HC zinc finger-like family protein |
|              | S9_147770955     | 9   | 147770955 | $1.61 \times 10^{-6}$ | 0.11178        | <i>Zm00001d048129</i> | Uncharacterized                      |
|              | S9_147771006     | 9   | 147771006 | $5.37 \times 10^{-6}$ | 0.09997        |                       |                                      |
| ASI-WW-17    | chr2.S_235348089 | 2   | 236172843 | $8.63 \times 10^{-6}$ | 0.10309        | <i>Zm00001d007934</i> | U3 SnRNA-associated protein 6        |
|              | S3_229071054     | 3   | 229071054 | $6.23 \times 10^{-6}$ | 0.10226        | <i>Zm00001d044593</i> | Nuclear pore complex protein NUP98A  |
|              | S7_134912267     | 7   | 134912267 | $6.85 \times 10^{-7}$ | 0.12185        | <i>Zm00001d020983</i> | 30S ribosomal protein S16-like       |
|              | S7_134881654     | 7   | 134881654 | $3.37 \times 10^{-7}$ | 0.12714        | <i>GRMZM2G173084</i>  | Uncharacterized                      |
|              | S7_134880687     | 7   | 134880687 | $8.44 \times 10^{-7}$ | 0.12031        |                       |                                      |
|              | PZE-107079981    | 7   | 134881823 | $1.04 \times 10^{-6}$ | 0.12823        |                       |                                      |
|              | S7_134880722     | 7   | 134880722 | $1.31 \times 10^{-6}$ | 0.11362        |                       |                                      |
| ASI-Delay-17 | S7_134877422     | 7   | 134877422 | $2.47 \times 10^{-6}$ | 0.10743        |                       |                                      |
|              |                  |     |           |                       |                |                       |                                      |
| ASI-Delay-17 | S3_199628962     | 3   | 199628962 | $1.14 \times 10^{-5}$ | 0.09626        | <i>Zm00001d043519</i> | Uncharacterized                      |
|              | chr8.S_166831645 | 8   | 166381545 | $1.05 \times 10^{-5}$ | 0.09997        | <i>Zm00001d012327</i> | Uncharacterized                      |
| ASI-WS-18    | S1_227596184     | 1   | 227596184 | $5.92 \times 10^{-6}$ | 0.08128        | <i>GRMZM5G814683</i>  | dof13-C2C2-Dof-transcription factor  |
|              | chr1.S_227534674 | 1   | 227596136 | $7.85 \times 10^{-6}$ | 0.08164        |                       |                                      |
|              | chr1.S_227535817 | 1   | 227597279 | $7.88 \times 10^{-6}$ | 0.08161        |                       |                                      |
|              | S10_141493232    | 10  | 141493232 | $4.52 \times 10^{-6}$ | 0.08344        | <i>Zm00001d026286</i> | 40S ribosomal protein S11            |
|              | chr10.S_65474329 | 10  | 65487087  | $7.86 \times 10^{-6}$ | 0.08164        | <i>Zm00001d024325</i> | probable protein phosphatase 2C 44   |
|              | S1_93513564      | 1   | 93513564  | $5.38 \times 10^{-6}$ | 0.08207        | <i>Zm00001d029938</i> | Protein ARABIDILLO 1                 |
|              | S1_93277641      | 1   | 93277641  | $6.06 \times 10^{-6}$ | 0.08113        | <i>Zm00001d029937</i> | Glycoprotein                         |
|              | PZE-103003226    | 3   | 2449913   | $1.03 \times 10^{-6}$ | 0.14322        | <i>Zm00001d039319</i> | Tic22-like family protein            |
|              | chr3.S_183263192 | 3   | 183319292 | $1.01 \times 10^{-5}$ | 0.07963        | <i>Zm00001d042997</i> | HIT-type Zinc finger family protein  |
| ASI-WW-18    | S1_93277641      | 1   | 93277641  | $2.20 \times 10^{-7}$ | 0.1079         | <i>Zm00001d029937</i> | Glycoprotein                         |
|              | S1_93277775      | 1   | 93277775  | $3.28 \times 10^{-7}$ | 0.10511        |                       |                                      |
|              | S1_93278150      | 1   | 93278150  | $7.29 \times 10^{-7}$ | 0.09852        |                       |                                      |
|              | S1_93513564      | 1   | 93513564  | $1.01 \times 10^{-6}$ | 0.09549        | <i>Zm00001d029938</i> | Protein ARABIDILLO 1                 |
|              | S1_93507046      | 1   | 93507046  | $2.48 \times 10^{-6}$ | 0.08831        |                       |                                      |
|              | S1_93505855      | 1   | 93505855  | $3.76 \times 10^{-6}$ | 0.08489        |                       |                                      |
|              | S1_93509892      | 1   | 93509892  | $3.76 \times 10^{-6}$ | 0.08489        |                       |                                      |
|              | S1_93510646      | 1   | 93510646  | $3.76 \times 10^{-6}$ | 0.08489        |                       |                                      |
|              | S1_93511155      | 1   | 93511155  | $3.76 \times 10^{-6}$ | 0.08489        |                       |                                      |
|              | S1_93510058      | 1   | 93510058  | $8.64 \times 10^{-6}$ | 0.07831        |                       |                                      |
|              | S1_93511521      | 1   | 93511521  | $8.64 \times 10^{-6}$ | 0.07831        |                       |                                      |

|               |                  |    |           |                       |         |                       |                                       |
|---------------|------------------|----|-----------|-----------------------|---------|-----------------------|---------------------------------------|
|               | S1_93513096      | 1  | 93513096  | $8.64 \times 10^{-6}$ | 0.07831 |                       |                                       |
|               | PZE-103003226    | 3  | 2449913   | $1.64 \times 10^{-6}$ | 0.10835 | <i>Zm00001d039319</i> | Tic22-like family protein             |
|               | chr3.S_183263192 | 3  | 183319292 | $1.66 \times 10^{-6}$ | 0.09449 | <i>Zm00001d042997</i> | HIT-type Zinc finger family protein   |
|               | S3_183315457     | 3  | 183315457 | $1.91 \times 10^{-6}$ | 0.09027 |                       |                                       |
|               | S3_183315658     | 3  | 183315658 | $1.91 \times 10^{-6}$ | 0.09027 |                       |                                       |
|               | S3_183316916     | 3  | 183316916 | $1.91 \times 10^{-6}$ | 0.09027 |                       |                                       |
|               | S3_183318642     | 3  | 183318642 | $1.91 \times 10^{-6}$ | 0.09027 |                       |                                       |
|               | S3_183315400     | 3  | 183315400 | $5.78 \times 10^{-6}$ | 0.08148 |                       |                                       |
|               | S3_183311733     | 3  | 183311733 | $7.14 \times 10^{-6}$ | 0.07982 |                       |                                       |
|               | S3_183311777     | 3  | 183311777 | $7.14 \times 10^{-6}$ | 0.07982 |                       |                                       |
|               | S2_7412314       | 2  | 7412314   | $7.30 \times 10^{-6}$ | 0.07974 | <i>GRMZM2G506383</i>  | Uncharacterized                       |
|               | S2_23597795      | 2  | 23597795  | $9.79 \times 10^{-6}$ | 0.08587 | <i>Zm00001d002837</i> | Uncharacterized                       |
|               | S3_183312336     | 3  | 183312336 | $4.81 \times 10^{-7}$ | 0.10139 | <i>Zm00001d042996</i> | 2-oxoglutarate (2OG)                  |
|               | PZE-103125662    | 3  | 183312373 | $9.90 \times 10^{-7}$ | 0.10227 |                       |                                       |
|               | S3_183312126     | 3  | 183312126 | $1.80 \times 10^{-6}$ | 0.09076 |                       |                                       |
|               | S3_183313223     | 3  | 183313223 | $2.45 \times 10^{-6}$ | 0.08831 |                       |                                       |
|               | S3_183312628     | 3  | 183312628 | $2.50 \times 10^{-6}$ | 0.08812 |                       |                                       |
|               | S3_183312177     | 3  | 183312177 | $3.32 \times 10^{-6}$ | 0.08588 |                       |                                       |
|               | S3_183311690     | 3  | 183311690 | $5.08 \times 10^{-6}$ | 0.08568 |                       |                                       |
|               | S3_183313231     | 3  | 183313231 | $5.29 \times 10^{-6}$ | 0.08311 |                       |                                       |
|               | S3_183321823     | 3  | 183321823 | $1.91 \times 10^{-6}$ | 0.09027 | <i>GRMZM2G037727</i>  | Uncharacterized                       |
|               | S3_183321994     | 3  | 183321994 | $1.91 \times 10^{-6}$ | 0.09027 |                       |                                       |
|               | S3_183322659     | 3  | 183322659 | $1.91 \times 10^{-6}$ | 0.09027 | <i>GRMZM2G033058</i>  | ATP binding cassette protein 1        |
|               | chr3.S_183268090 | 3  | 183324190 | $6.33 \times 10^{-6}$ | 0.08345 |                       |                                       |
|               | chr8.S_145191985 | 8  | 144727028 | $8.76 \times 10^{-6}$ | 0.0808  | <i>Zm00001d011398</i> | MAKR gene family protein              |
|               | S8_64083558      | 8  | 64083558  | $9.81 \times 10^{-6}$ | 0.07731 | <i>Zm00001d009446</i> | VIP1 protein (bZIP TF in arabidopsis) |
|               | S9_155724571     | 9  | 155724571 | $1.00 \times 10^{-6}$ | 0.09546 | <i>Zm00001d048551</i> | cnr6 - Cell Number Regulator 6        |
|               | S9_155728197     | 9  | 155728197 | $9.69 \times 10^{-6}$ | 0.0804  | <i>Zm00001d048552</i> | Helicase CHR10                        |
|               | S10_120515824    | 10 | 120515824 | $6.74 \times 10^{-6}$ | 0.08027 | <i>Zm00001d025533</i> | Oxidoreductase, aldo/keto reductase   |
| ASI- Delay-18 | S1_209173685     | 1  | 209173685 | $2.57 \times 10^{-6}$ | 0.09138 | <i>Zm00001d032084</i> | Chaperone protein dnaJ                |
|               | PZE-101166186    | 1  | 209173942 | $1.02 \times 10^{-5}$ | 0.08636 |                       |                                       |
|               | S8_174647623     | 8  | 174647623 | $9.49 \times 10^{-6}$ | 0.08062 | <i>Zm00001d012766</i> | Probable pectin-esterase 53           |
| ASI-WS-20     | S1_260576586     | 1  | 260576586 | $9.15 \times 10^{-6}$ | 0.09576 | <i>Zm00001d033510</i> | Uncharacterized                       |
| ASI-WW-20     | chr5.S_182249972 | 5  | 182300531 | $4.68 \times 10^{-6}$ | 0.11738 | <i>Zm00001d017146</i> | Uncharacterized                       |

Table S3. Annotation of SNPs associated with ear biomass at silking date (EBM) under two water regimes

| Traits       | Marker           | Chr | Position  | P value               | R <sup>2</sup> | Gene ID               | Annotation                                  |
|--------------|------------------|-----|-----------|-----------------------|----------------|-----------------------|---------------------------------------------|
| EBM-WS-17    | S1_175670732     | 1   | 175670732 | $7.31 \times 10^{-6}$ | 0.09788        | <i>Zm00001d031109</i> | yab11 - C2C2-YABBY-TF 11                    |
|              | S5_56454527      | 5   | 56454527  | $4.87 \times 10^{-6}$ | 0.1018         | <i>Zm00001d014669</i> | Cadmium/zinc-transporting ATPase            |
|              | S8_161338291     | 8   | 161338291 | $8.61 \times 10^{-7}$ | 0.12174        | <i>Zm00001d012031</i> | Uncharacterized                             |
|              | S8_161329625     | 8   | 161329625 | $8.02 \times 10^{-6}$ | 0.09693        | <i>Zm00001d012030</i> | E2 protein isoform 5                        |
| EBM-WW-17    | S7_116404702     | 7   | 116404702 | $1.62 \times 10^{-6}$ | 0.11426        | <i>Zm00001d020511</i> | Ubiquitin-NEDD8-like protein RUB1           |
|              | S7_116402724     | 7   | 116402724 | $1.06 \times 10^{-6}$ | 0.11891        | <i>Zm00001d020510</i> | COX17-Cytochrome C oxidase copper chaperone |
|              | S7_116399400     | 7   | 116399400 | $1.42 \times 10^{-6}$ | 0.11558        |                       |                                             |
|              | S7_116399515     | 7   | 116399515 | $1.74 \times 10^{-6}$ | 0.11357        |                       |                                             |
|              | S7_116399159     | 7   | 116399159 | $2.11 \times 10^{-6}$ | 0.11193        |                       |                                             |
|              | S7_116399213     | 7   | 116399213 | $2.11 \times 10^{-6}$ | 0.11193        |                       |                                             |
|              | S7_116402441     | 7   | 116402441 | $2.11 \times 10^{-6}$ | 0.11193        |                       |                                             |
|              | S7_116402616     | 7   | 116402616 | $3.09 \times 10^{-6}$ | 0.11297        |                       |                                             |
|              | S7_116402618     | 7   | 116402618 | $3.09 \times 10^{-6}$ | 0.11297        |                       |                                             |
|              | S7_116402494     | 7   | 116402494 | $3.11 \times 10^{-6}$ | 0.10932        |                       |                                             |
|              | chr7.S_116374791 | 7   | 116402744 | $3.44 \times 10^{-6}$ | 0.11075        |                       |                                             |
|              | chr7.S_116371117 | 7   | 116399070 | $4.01 \times 10^{-6}$ | 0.10917        |                       |                                             |
|              | S8_133600163     | 8   | 133600163 | $4.83 \times 10^{-6}$ | 0.10334        | <i>GRMZM2G077691</i>  | Transposable element                        |
|              |                  |     |           |                       |                |                       |                                             |
| EBM-ratio-17 | S5_48601401      | 5   | 48601401  | $7.77 \times 10^{-6}$ | 0.09738        | <i>GRMZM5G848124</i>  | Uncharacterized                             |
|              | chr5.S_160451114 | 5   | 160490546 | $1.00 \times 10^{-5}$ | 0.09881        | <i>Zm00001d016479</i> | Importin beta-like SAD2                     |
| EBM-WS-18    | S2_171411900     | 2   | 171411900 | $7.54 \times 10^{-7}$ | 0.10143        | <i>Zm00001d005478</i> | Cellulose synthase A catalytic subunit 6    |
|              | S2_214078538     | 2   | 214078538 | $7.88 \times 10^{-7}$ | 0.10137        | <i>Zm00001d007009</i> | DNAJ heat shock protein                     |
|              | S2_214059088     | 2   | 214059088 | $1.35 \times 10^{-6}$ | 0.09632        |                       |                                             |
|              | S2_214060345     | 2   | 214060345 | $5.53 \times 10^{-6}$ | 0.08468        |                       |                                             |
|              | S2_214064988     | 2   | 214064988 | $5.53 \times 10^{-6}$ | 0.08468        |                       |                                             |
|              | S2_214065975     | 2   | 214065975 | $5.53 \times 10^{-6}$ | 0.08468        |                       |                                             |
|              | S2_214058926     | 2   | 214058926 | $6.61 \times 10^{-6}$ | 0.08338        |                       |                                             |
|              | S2_219686839     | 2   | 219686839 | $9.95 \times 10^{-6}$ | 0.0799         | <i>GRMZM2G169681</i>  | Uncharacterized                             |

|           |                  |   |           |                       |         |                       |                                               |
|-----------|------------------|---|-----------|-----------------------|---------|-----------------------|-----------------------------------------------|
|           | chr3.S_223690139 | 3 | 223776896 | $5.17 \times 10^{-6}$ | 0.0872  | <i>Zm00001d044411</i> | Putative calcium-binding protein CML15        |
|           | S3_224664363     | 3 | 224664363 | $8.95 \times 10^{-6}$ | 0.08207 | <i>GRMZM2G034430</i>  | Carbon catabolite repressor protein4 homolog6 |
|           | S3_223834589     | 3 | 223834589 | $8.99 \times 10^{-6}$ | 0.08084 | <i>Zm00001d044418</i> | Uncharacterized                               |
|           | S5_33998541      | 5 | 33998541  | $8.38 \times 10^{-6}$ | 0.08281 | <i>Zm00001d014180</i> | Flowering locus K homology domain             |
|           | chr6.S_22666648  | 6 | 22666161  | $4.05 \times 10^{-6}$ | 0.08926 | <i>Zm00001d035318</i> | Uncharacterized                               |
|           | chr6.S_22666649  | 6 | 22666162  | $4.05 \times 10^{-6}$ | 0.08926 |                       |                                               |
|           | chr6.S_22666666  | 6 | 22666179  | $4.05 \times 10^{-6}$ | 0.08926 |                       |                                               |
|           | chr6.S_22666667  | 6 | 22666180  | $8.98 \times 10^{-6}$ | 0.08257 |                       |                                               |
|           | S7_140295502     | 7 | 140295502 | $1.47 \times 10^{-6}$ | 0.09638 | <i>GRMZM2G176403</i>  | Uncharacterized                               |
|           | chr7.S_138909741 | 7 | 138946464 | $7.95 \times 10^{-6}$ | 0.0836  | <i>Zm00001d021136</i> | Salt-inducible protein ser/thr/tyr kinase     |
|           | chr7.S_130785502 | 7 | 130818260 | $8.27 \times 10^{-6}$ | 0.08326 | <i>Zm00001d020853</i> | RNA 3-terminal phosphate cyclase-like         |
|           | chr7.S_130785503 | 7 | 130818261 | $8.27 \times 10^{-6}$ | 0.08326 |                       |                                               |
|           | chr7.S_130785504 | 7 | 130818262 | $8.27 \times 10^{-6}$ | 0.08326 |                       |                                               |
|           | chr7.S_130785505 | 7 | 130818263 | $8.27 \times 10^{-6}$ | 0.08326 |                       |                                               |
|           | S9_153782708     | 9 | 153782708 | $2.84 \times 10^{-6}$ | 0.09024 | <i>Zm00001d048454</i> | fha17 - FHA-transcription factor 17           |
| EBM-WW-18 | chr1.S_288855240 | 1 | 288926160 | $3.11 \times 10^{-7}$ | 0.11155 | <i>Zm00001d034485</i> | Uncharacterized                               |
|           | chr1.S_288855249 | 1 | 288926169 | $3.11 \times 10^{-7}$ | 0.11155 |                       |                                               |
|           | S1_288927107     | 1 | 288927107 | $8.34 \times 10^{-7}$ | 0.10095 | <i>Zm00001d034486</i> | Small GTP-binding protein domain              |
|           | chr1.S_220201354 | 1 | 220253493 | $8.65 \times 10^{-7}$ | 0.1027  | <i>Zm00001d032350</i> | Uncharacterized                               |
|           | chr1.S_220205446 | 1 | 220257585 | $2.62 \times 10^{-6}$ | 0.09324 |                       |                                               |
|           | S1_220254047     | 1 | 220254047 | $3.07 \times 10^{-6}$ | 0.09008 |                       |                                               |
|           | S1_220253843     | 1 | 220253843 | $3.36 \times 10^{-6}$ | 0.08949 |                       |                                               |
|           | S1_220254311     | 1 | 220254311 | $3.36 \times 10^{-6}$ | 0.08949 |                       |                                               |
|           | S1_220254828     | 1 | 220254828 | $3.36 \times 10^{-6}$ | 0.08949 |                       |                                               |
|           | S1_220255630     | 1 | 220255630 | $3.36 \times 10^{-6}$ | 0.08949 |                       |                                               |
|           | S1_220255662     | 1 | 220255662 | $3.36 \times 10^{-6}$ | 0.08949 |                       |                                               |
|           | S1_220256130     | 1 | 220256130 | $3.36 \times 10^{-6}$ | 0.08949 |                       |                                               |
|           | S1_220256256     | 1 | 220256256 | $5.44 \times 10^{-6}$ | 0.08551 |                       |                                               |
|           | chr1.S_93801342  | 1 | 93810262  | $7.62 \times 10^{-6}$ | 0.08422 | <i>Zm00001d029946</i> | Uncharacterized                               |

|                  |   |           |                       |         |                       |                                                 |
|------------------|---|-----------|-----------------------|---------|-----------------------|-------------------------------------------------|
| chr1.S_93801339  | 1 | 93810259  | $9.36 \times 10^{-6}$ | 0.0825  |                       |                                                 |
| chr1.S_93801340  | 1 | 93810260  | $9.36 \times 10^{-6}$ | 0.0825  |                       |                                                 |
| S1_248346174     | 1 | 248346174 | $8.55 \times 10^{-6}$ | 0.08163 | <i>Zm00001d033152</i> | ent-cassadiene C2-hydroxylase like              |
| S1_291598670     | 1 | 291598670 | $8.97 \times 10^{-6}$ | 0.08124 | <i>Zm00001d034581</i> | Uncharacterized                                 |
| S2_3377419       | 2 | 3377419   | $2.62 \times 10^{-6}$ | 0.09146 | <i>GRMZM2G047590</i>  | Peptidyl-prolyl cis-trans isomerase             |
| S2_157500038     | 2 | 157500038 | $5.32 \times 10^{-6}$ | 0.08577 | <i>Zm00001d005156</i> | Uncharacterized                                 |
| S2_213196915     | 2 | 213196915 | $5.57 \times 10^{-6}$ | 0.08522 | <i>Zm00001d006917</i> | Leucine-rich repeat protein kinase protein      |
| chr3.S_68601919  | 3 | 68605119  | $4.38 \times 10^{-7}$ | 0.10856 | <i>GRMZM2G132222</i>  | Uncharacterized                                 |
| S3_13321362      | 3 | 13321362  | $2.92 \times 10^{-6}$ | 0.0905  | <i>Zm00001d039703</i> | Autophagy-related protein 18c                   |
| S3_197351667     | 3 | 197351667 | $4.56 \times 10^{-6}$ | 0.08695 | <i>Zm00001d043444</i> | Uncharacterized                                 |
| S3_173846291     | 3 | 173846291 | $8.07 \times 10^{-6}$ | 0.08777 | <i>Zm00001d042673</i> | Amido-phospho-ribosyl-transferase               |
| S4_202697624     | 4 | 202697624 | $7.94 \times 10^{-8}$ | 0.12095 | <i>Zm00001d052974</i> | Uncharacterized                                 |
| chr4.S_202441033 | 4 | 202618874 | $1.09 \times 10^{-7}$ | 0.1207  | <i>GRMZM5G866910</i>  | Uncharacterized                                 |
| chr4.S_202441044 | 4 | 202618885 | $1.09 \times 10^{-7}$ | 0.1207  |                       |                                                 |
| chr4.S_202440988 | 4 | 202618829 | $1.88 \times 10^{-6}$ | 0.09604 |                       |                                                 |
| chr4.S_202440997 | 4 | 202618838 | $1.88 \times 10^{-6}$ | 0.09604 |                       |                                                 |
| chr4.S_202440908 | 4 | 202618749 | $2.49 \times 10^{-6}$ | 0.09366 |                       |                                                 |
| chr4.S_202440922 | 4 | 202618763 | $2.49 \times 10^{-6}$ | 0.09366 |                       |                                                 |
| S4_2116917       | 4 | 2116917   | $6.42 \times 10^{-6}$ | 0.08461 | <i>Zm00001d048655</i> | Splicing factor U2AF subunit                    |
| S4_199975624     | 4 | 199975624 | $7.68 \times 10^{-6}$ | 0.08251 | <i>Zm00001d052903</i> | 3-hydroxy-3-methylglutaryl-coenzyme A reductase |
| S4_199977361     | 4 | 199977361 | $7.68 \times 10^{-6}$ | 0.08251 |                       |                                                 |
| S4_224578178     | 4 | 224578178 | $7.82 \times 10^{-6}$ | 0.08237 | <i>Zm00001d053376</i> | Ankyrin repeat family protein                   |
| S5_202476687     | 5 | 202476687 | $7.24 \times 10^{-6}$ | 0.12174 | <i>Zm00001d017826</i> | 3-hydroxy-3methylglutaryl-coenzyme A reductase1 |
| S5_202472440     | 5 | 202472440 | $2.80 \times 10^{-7}$ | 0.11018 |                       |                                                 |
| S5_202473422     | 5 | 202473422 | $7.75 \times 10^{-6}$ | 0.08247 |                       |                                                 |
| S5_202473991     | 5 | 202473991 | $7.75 \times 10^{-6}$ | 0.08247 |                       |                                                 |
| S5_215101922     | 5 | 215101922 | $8.02 \times 10^{-6}$ | 0.08221 | <i>Zm00001d018443</i> | Ankyrin repeat domain-containing protein        |
| S6_84691343      | 6 | 84691343  | $2.42 \times 10^{-6}$ | 0.09206 | <i>Zm00001d036418</i> | Uncharacterized                                 |
| chr6.S_60854926  | 6 | 61014126  | $2.43 \times 10^{-6}$ | 0.09387 | <i>GRMZM2G083408</i>  | Uncharacterized                                 |



|              |                  |    |           |                       |         |                       |                                                  |
|--------------|------------------|----|-----------|-----------------------|---------|-----------------------|--------------------------------------------------|
|              | chr6.S_60854810  | 6  | 61014010  | $3.91 \times 10^{-6}$ | 0.08983 |                       |                                                  |
|              | S8_170767138     | 8  | 170767138 | $3.70 \times 10^{-6}$ | 0.08853 | <i>Zm00001d012550</i> | Brassinosteroid Insensitive 1-associated kinase1 |
|              | chr8.S_157000495 | 8  | 156540497 | $3.82 \times 10^{-6}$ | 0.09003 | <i>Zm00001d011805</i> | PH, RCC1 and FYVE domains-containing protein1    |
|              | S9_111272103     | 9  | 111272103 | $2.73 \times 10^{-6}$ | 0.09105 | <i>Zm00001d046981</i> | Glk32: MYB DNA-binding domain family protein     |
|              | S9_111273022     | 9  | 111273022 | $7.44 \times 10^{-6}$ | 0.08277 |                       |                                                  |
|              | chr10.S_77114987 | 10 | 77128337  | $1.01 \times 10^{-6}$ | 0.10138 | <i>GRMZM2G171236</i>  | Mitochondrial NADH ubiquinone oxidoreductase     |
|              | S10_145607097    | 10 | 145607097 | $2.09 \times 10^{-6}$ | 0.09327 | <i>Zm00001d026489</i> | G-type lectin S-receptor-like ser/thr-protein    |
|              | S10_124087230    | 10 | 124087230 | $9.49 \times 10^{-7}$ | 0.09986 | <i>Zm00001d025653</i> | Uncharacterized                                  |
|              | S10_124086814    | 10 | 124086814 | $2.85 \times 10^{-6}$ | 0.09068 |                       |                                                  |
|              | S10_124087099    | 10 | 124087099 | $2.85 \times 10^{-6}$ | 0.09068 |                       |                                                  |
|              | S10_124088126    | 10 | 124088126 | $2.85 \times 10^{-6}$ | 0.09068 |                       |                                                  |
|              | S10_13791295     | 10 | 13791295  | $3.34 \times 10^{-6}$ | 0.08937 | <i>Zm00001d023659</i> | Uncharacterized                                  |
|              | chr10.S_13785048 | 10 | 13790345  | $5.08 \times 10^{-6}$ | 0.08762 |                       |                                                  |
|              | chr10.S_13785085 | 10 | 13790382  | $5.08 \times 10^{-6}$ | 0.08762 |                       |                                                  |
|              | S10_13790953     | 10 | 13790953  | $5.43 \times 10^{-6}$ | 0.08617 |                       |                                                  |
|              | S10_137779511    | 10 | 137779511 | $2.91 \times 10^{-6}$ | 0.09103 | <i>Zm00001d026124</i> | Ser/Thr-rich protein T10 in DGCR region          |
|              | S10_137778405    | 10 | 137778405 | $6.09 \times 10^{-6}$ | 0.08442 |                       |                                                  |
|              | S10_137779762    | 10 | 137779762 | $6.09 \times 10^{-6}$ | 0.08442 |                       |                                                  |
|              | chr10.S_16206542 | 10 | 16211639  | $1.01 \times 10^{-5}$ | 0.08185 | <i>Zm00001d023706</i> | Uncharacterized                                  |
| EBM-ratio-18 | S1_244829817     | 1  | 244829817 | $4.46 \times 10^{-6}$ | 0.08834 | <i>Zm00001d033048</i> | Protein TIFY 11d                                 |
|              | S1_122479055     | 1  | 122479055 | $8.56 \times 10^{-6}$ | 0.0829  | <i>Zm00001d030348</i> | Alcohol dehydrogenase superfamily protein        |
|              | chr1.S_244834434 | 1  | 244893365 | $9.36 \times 10^{-6}$ | 0.08302 | <i>Zm00001d033049</i> | Zim motif family protein                         |
|              | chr3.S_194426127 | 3  | 194489685 | $2.57 \times 10^{-6}$ | 0.09399 | <i>Zm00001d043350</i> | Indole-3-acetic acid-amido synthetase            |
|              | chr3.S_194426048 | 3  | 194489606 | $8.75 \times 10^{-6}$ | 0.08358 |                       |                                                  |
|              | chr3.S_161574589 | 3  | 161617387 | $4.73 \times 10^{-6}$ | 0.08879 | <i>Zm00001d042361</i> | Wiscott-Aldrich syndrome, C-terminal             |
|              | S3_224976707     | 3  | 224976707 | $6.84 \times 10^{-6}$ | 0.08478 | <i>Zm00001d044457</i> | Pentatricopeptide repeat-containing protein      |
|              | S3_219483425     | 3  | 219483425 | $8.18 \times 10^{-6}$ | 0.08328 | <i>Zm00001d044253</i> | Putative calmodulin-binding family protein       |
|              | S6_34439990      | 6  | 34439990  | $6.46 \times 10^{-6}$ | 0.08528 | <i>Zm00001d035597</i> | RmlC-like cupins superfamily protein             |
|              | chr7.S_157473811 | 7  | 157512141 | $2.63 \times 10^{-6}$ | 0.0938  | <i>GRMZM5G862799</i>  | F-box family protein                             |

|              |                   |    |           |                       |         |                       |                                            |
|--------------|-------------------|----|-----------|-----------------------|---------|-----------------------|--------------------------------------------|
|              | chr10.S_134053634 | 10 | 134078101 | $5.31 \times 10^{-6}$ | 0.0878  | <i>Zm00001d025984</i> | Glutamic dehydrogenase-2                   |
| EBM-WS-20    | PZE-101095906     | 1  | 94310713  | $2.03 \times 10^{-6}$ | 0.12344 | <i>GRMZM2G141692</i>  | Uncharacterized                            |
|              | S4_228551470      | 4  | 228551470 | $6.17 \times 10^{-7}$ | 0.12146 | <i>GRMZM2G092321</i>  | Uncharacterized                            |
|              | S4_228551398      | 4  | 228551398 | $7.82 \times 10^{-6}$ | 0.09672 |                       |                                            |
|              | S6_162532432      | 6  | 162532432 | $8.47 \times 10^{-7}$ | 0.11809 | <i>Zm00001d038892</i> | Putative clathrin assembly protein         |
|              | S6_162534514      | 6  | 162534514 | $8.47 \times 10^{-7}$ | 0.11809 |                       |                                            |
|              | S6_162536035      | 6  | 162536035 | $8.47 \times 10^{-7}$ | 0.11809 |                       |                                            |
|              | S6_162537399      | 6  | 162537399 | $8.47 \times 10^{-7}$ | 0.11809 |                       |                                            |
|              | S6_162533364      | 6  | 162533364 | $7.78 \times 10^{-6}$ | 0.09637 |                       |                                            |
|              | S6_162570085      | 6  | 162570085 | $8.47 \times 10^{-7}$ | 0.11809 | <i>Zm00001d038894</i> | serine/threonine-protein kinase            |
|              | S6_162570196      | 6  | 162570196 | $8.47 \times 10^{-7}$ | 0.11809 |                       |                                            |
|              | S6_162581385      | 6  | 162581385 | $8.47 \times 10^{-7}$ | 0.11809 |                       |                                            |
|              | S7_172922172      | 7  | 172922172 | $5.84 \times 10^{-6}$ | 0.09914 | <i>Zm00001d022451</i> | CBL-interacting ser/thr protein kinase-11  |
|              | S10_137853965     | 10 | 137853965 | $5.53 \times 10^{-6}$ | 0.09998 | <i>Zm00001d026126</i> | Protein kinase APK1B chloroplast precursor |
| EBM-WW-20    | S3_224575443      | 3  | 224575443 | $7.52 \times 10^{-6}$ | 0.09617 | <i>Zm00001d044443</i> | ABC transporter G family member 37         |
|              | S5_169712325      | 5  | 169712325 | $5.01 \times 10^{-6}$ | 0.10135 | <i>Zm00001d016716</i> | Integrin beta-1 binding protein2           |
|              | S7_145118663      | 7  | 145118663 | $8.77 \times 10^{-6}$ | 0.09469 | <i>Zm00001d021365</i> | DNA primases                               |
|              | S8_66507071       | 8  | 66507071  | $4.19 \times 10^{-7}$ | 0.12518 | <i>Zm00001d009508</i> | DUF1639 family protein                     |
|              | S8_71150682       | 8  | 71150682  | $4.89 \times 10^{-6}$ | 0.10059 | <i>Zm00001d009603</i> | Major facilitator super family protein     |
|              | S8_68927325       | 8  | 68927325  | $1.00 \times 10^{-5}$ | 0.09339 | <i>Zm00001d009564</i> | Guanylate-binding family protein           |
| EBM-ratio-20 | S1_15169238       | 1  | 15169238  | $9.90 \times 10^{-6}$ | 0.09509 | <i>Zm00001d027856</i> | Kelch motif family protein                 |
|              | S7_155627315      | 7  | 155627315 | $6.54 \times 10^{-6}$ | 0.10202 | <i>Zm00001d021707</i> | Histone H2A                                |
|              | chr9.S_30644685   | 9  | 30657881  | $7.45 \times 10^{-6}$ | 0.10508 | <i>Zm00001d045644</i> | Uncharacterized                            |
|              | chr9.S_30644677   | 9  | 30657873  | $1.02 \times 10^{-5}$ | 0.10181 |                       |                                            |

Table S4. Annotation of SNPs associated with plant height under two water regimes

| Traits      | Marker           | Chr | Position  | P value               | R <sup>2</sup> | Gene ID               | Annotation                                     |
|-------------|------------------|-----|-----------|-----------------------|----------------|-----------------------|------------------------------------------------|
| PH-WS-17    | chr2.S_68691618  | 2   | 69321921  | $2.98 \times 10^{-7}$ | 0.14098        | <i>Zm00001d003939</i> | 11-β-hydroxysteroid dehydrogenase              |
|             | chr2.S_68691621  | 2   | 69321924  | $2.98 \times 10^{-7}$ | 0.14098        |                       |                                                |
|             | S2_218026770     | 2   | 218026770 | $1.11 \times 10^{-6}$ | 0.11601        | <i>Zm00001d007189</i> | Uncharacterized                                |
|             | S2_226449870     | 2   | 226449870 | $2.08 \times 10^{-6}$ | 0.10972        | <i>GRMZM2G070937</i>  | Leu-rich repeat protein kinase family protein  |
|             | PZE-102080818    | 2   | 65373690  | $6.66 \times 10^{-6}$ | 0.11358        | <i>Zm00001d003904</i> | Uncharacterized                                |
|             | chr2.S_64748927  | 2   | 65379330  | $7.85 \times 10^{-6}$ | 0.1055         |                       |                                                |
|             | chr2.S_178974821 | 2   | 179624271 | $1.02 \times 10^{-5}$ | 0.10277        | <i>GRMZM2G030522</i>  | Uncharacterized                                |
| PH-WW-17    | chr2.S_68691618  | 2   | 69321921  | $7.15 \times 10^{-8}$ | 0.15528        | <i>Zm00001d003939</i> | 11-β-hydroxysteroid dehydrogenase              |
|             | chr2.S_68691621  | 2   | 69321924  | $7.15 \times 10^{-8}$ | 0.15528        |                       |                                                |
|             | S2_218026770     | 2   | 218026770 | $1.95 \times 10^{-6}$ | 0.11069        | <i>Zm00001d007189</i> | Uncharacterized                                |
|             | S2_226449870     | 2   | 226449870 | $9.07 \times 10^{-6}$ | 0.09541        | <i>GRMZM2G070937</i>  | Leu-rich repeat protein kinase family protein  |
| PH-ratio-17 | chr2.S_2082318   | 2   | 2084691   | $8.17 \times 10^{-6}$ | 0.1044         | <i>Zm00001d001865</i> | Cytokinin response regulator 1                 |
| PH-WS-18    | S8_163927011     | 8   | 163927011 | $4.47 \times 10^{-6}$ | 0.07836        | <i>Zm00001d012167</i> | SF16 (Silk Fibroin) protein                    |
| PH-WW-18    | S8_163927011     | 8   | 163927011 | $8.67 \times 10^{-6}$ | 0.07275        | <i>Zm00001d012167</i> | SF16 (Silk Fibroin) protein                    |
|             | S8_163927012     | 8   | 163927012 | $9.66 \times 10^{-6}$ | 0.07196        |                       |                                                |
|             | S10_87704955     | 10  | 87704955  | $4.39 \times 10^{-6}$ | 0.07953        | <i>Zm00001d024783</i> | Bhlh-Transcriptional factor 117                |
|             | S10_87705054     | 10  | 87705054  | $9.38 \times 10^{-6}$ | 0.07221        |                       |                                                |
| PH-ratio-18 | S7_16920783      | 7   | 16920783  | $9.09 \times 10^{-6}$ | 0.07442        | <i>Zm00001d019114</i> | rRNA biogenesis protein RRP5                   |
|             | S9_149312650     | 9   | 149312650 | $7.20 \times 10^{-6}$ | 0.07704        | <i>Zm00001d048194</i> | hagtf36 - GNAT-TF 36                           |
| PH-WS-20    | S1_181916365     | 1   | 181916365 | $8.09 \times 10^{-6}$ | 0.10541        | <i>Zm00001d031254</i> | Non-functional riboflavin biosynthesis protein |
| PH-WW-20    | S8_158798073     | 8   | 158798073 | $6.70 \times 10^{-6}$ | 0.09874        | <i>Zm00001d011891</i> | Esterase D; S-formylglutathione hydrolase      |

Table S5. Haplotype analysis of *Zm00001d013992* for EBM in 2018 and 2020

| Haplotype   | S5_27121944 | EBM-WS-2018 | EBM-WS-2020 |
|-------------|-------------|-------------|-------------|
| <i>HapA</i> | A           | 1.25        | 1.42        |
| <i>HapB</i> | G           | 2.10        | 2.10        |

Table S6. Haplotype analysis of *Zm00001d020506* for EBM in 2017

| Haplotype   | chr7.S_116288756 | chr7.S_116288791 | chr7.S_116288792 | chr7.S_116285652 | chr7.S_116285655 | EBM-WS | EBM-WW |
|-------------|------------------|------------------|------------------|------------------|------------------|--------|--------|
| <i>HapA</i> | A                | A                | C                | C                | T                | 1.58   | 1.79   |
| <i>HapB</i> | G                | T                | T                | T                | C                | 1.35   | 1.55   |

Table S7. Haplotype analysis of *Zm00001d029937* for ASI in 2018

| Haplotype   | S1_93277641 | S1_93277775 | S1_93278150 | ASI-WS | ASI-WW |
|-------------|-------------|-------------|-------------|--------|--------|
| <i>HapA</i> | A           | A           | C           | 12.21  | 11.61  |
| <i>HapB</i> | G           | G           | G           | 6.69   | 5.67   |

Table S8. Haplotype analysis of *Zm00001d029938* for ASI in 2018

| Haplotype   | S1_93513564 | S1_93507046 | S1_93505855 | S1_93509892 | S1_93510646 | S1_93511155 | S1_93510058 | S1_93511521 | S1_93513096 | ASI-<br>WS | ASI-<br>WW |
|-------------|-------------|-------------|-------------|-------------|-------------|-------------|-------------|-------------|-------------|------------|------------|
| <i>HapA</i> | T           | C           | G           | A           | T           | A           | A           | T           | C           | 12.63      | 11.61      |
| <i>HapB</i> | C           | T           | C           | C           | C           | G           | C           | C           | T           | 6.64       | 5.65       |

Table S9. Haplotype analysis of *Zm00001d039319* for ASI in 2018

| Haplotype   | PZE-103003226 | ASI-WS | ASI-WW |
|-------------|---------------|--------|--------|
| <i>HapA</i> | G             | 5.41   | 9.70   |
| <i>HapB</i> | T             | 6.40   | 11.46  |



Table S10. Haplotype analysis for *Zm00001d042997* for ASI in 2018

| Haplotype   | chr3.S_183263192 | S3_183315457 | S3_183315658 | S3_183316916 | S3_183318642 | S3_183315400 | S3_183311733 | S3_183311777 | ASI-WS | ASI-WW |
|-------------|------------------|--------------|--------------|--------------|--------------|--------------|--------------|--------------|--------|--------|
| <i>HapA</i> | A                | A            | C            | T            | C            | C            | C            | G            | 6.51   | 5.34   |
| <i>HapB</i> | A                | A            | C            | T            | C            | T            | A            | A            | 6.27   | 5.73   |
| <i>HapC</i> | T                | G            | A            | C            | T            | T            | A            | A            | 12.15  | 11.30  |
